# Supplementary material
Source: bioRxiv or medRxiv preprint supplement (https://www.medrxiv.org/highwire/filestream/73613/field_highwire_adjunct_files/1/2020.03.12.20034165-2.pdf)
Supplement: Supplementary file [file 2020.03.12.20034165-2.pdf]

## Supplementary Table 2

All genes with differential expression between POP and non-POP tissues of 12 premenopausal women with POP and a corrected P-value < 0,01

| <b>Gene</b>     | <b>FC</b> | <b>P value</b> | <b>Corr P value</b> |
|-----------------|-----------|----------------|---------------------|
| <i>A4GALT</i>   | 1,31      | 4,12E-05       | 3,33E-03            |
| <i>AADAT</i>    | -1,25     | 5,14E-05       | 3,80E-03            |
| <i>AAED1</i>    | 1,52      | 5,03E-07       | 4,87E-04            |
| <i>AARS2</i>    | -1,21     | 1,06E-05       | 1,65E-03            |
| <i>ABCB4</i>    | 1,29      | 1,10E-06       | 6,46E-04            |
| <i>ABCC5</i>    | -1,34     | 2,72E-04       | 8,80E-03            |
| <i>ABCG2</i>    | -1,35     | 5,67E-05       | 3,99E-03            |
| <i>ABHD10</i>   | -1,18     | 6,07E-05       | 4,06E-03            |
| <i>ABL2</i>     | 1,82      | 4,38E-07       | 4,87E-04            |
| <i>ACAP1</i>    | -1,25     | 5,57E-06       | 1,25E-03            |
| <i>ACKR3</i>    | 1,69      | 1,02E-04       | 5,53E-03            |
| <i>ACSS1</i>    | -1,21     | 3,29E-04       | 9,94E-03            |
| <i>ACTA1</i>    | 3,44      | 4,32E-05       | 3,43E-03            |
| <i>ACYP1</i>    | -1,19     | 2,30E-04       | 8,02E-03            |
| <i>ADA2</i>     | 1,20      | 2,29E-04       | 8,02E-03            |
| <i>ADAMTS1</i>  | 2,21      | 1,72E-04       | 6,98E-03            |
| <i>ADGRL2</i>   | 1,31      | 2,98E-05       | 2,86E-03            |
| <i>AEN</i>      | 1,26      | 1,91E-04       | 7,36E-03            |
| <i>AHI1</i>     | 1,16      | 4,89E-05       | 3,69E-03            |
| <i>AKIRIN1</i>  | 1,31      | 1,53E-05       | 2,08E-03            |
| <i>AKR1C1</i>   | 1,55      | 1,74E-04       | 7,01E-03            |
| <i>AKR1C2</i>   | 1,55      | 1,74E-04       | 7,01E-03            |
| <i>AKR1C3</i>   | 1,38      | 2,53E-04       | 8,40E-03            |
| <i>ALCAM</i>    | 1,43      | 1,65E-04       | 6,87E-03            |
| <i>ALDH9A1</i>  | -1,19     | 1,02E-04       | 5,52E-03            |
| <i>ALKBH4</i>   | -1,22     | 1,87E-04       | 7,29E-03            |
| <i>AMOTL1</i>   | 1,33      | 2,92E-05       | 2,82E-03            |
| <i>AMY1C</i>    | -1,26     | 8,22E-05       | 4,89E-03            |
| <i>ANGEL1</i>   | -1,15     | 2,82E-04       | 8,99E-03            |
| <i>ANK3</i>     | 1,62      | 1,49E-05       | 2,06E-03            |
| <i>ANKAR</i>    | -1,34     | 1,35E-05       | 1,92E-03            |
| <i>ANKFY1</i>   | -1,22     | 1,58E-04       | 6,74E-03            |
| <i>ANKRD37</i>  | 1,97      | 2,35E-05       | 2,59E-03            |
| <i>ANKRD49</i>  | -1,19     | 1,77E-04       | 7,08E-03            |
| <i>AP4B1</i>    | -1,17     | 3,15E-05       | 2,95E-03            |
| <i>APOLD1</i>   | 2,96      | 5,05E-05       | 3,77E-03            |
| <i>AREG</i>     | 3,19      | 3,06E-05       | 2,90E-03            |
| <i>ARG2</i>     | 1,38      | 3,16E-04       | 9,69E-03            |
| <i>ARHGAP10</i> | 1,36      | 1,83E-04       | 7,23E-03            |

|                 |       |          |          |
|-----------------|-------|----------|----------|
| <i>ARHGAP18</i> | -1,33 | 1,42E-04 | 6,45E-03 |
| <i>ARID5A</i>   | 2,67  | 4,89E-07 | 4,87E-04 |
| <i>ARID5B</i>   | 1,36  | 9,82E-05 | 5,42E-03 |
| <i>ARL4A</i>    | -1,33 | 1,30E-04 | 6,13E-03 |
| <i>ARMC5</i>    | 1,21  | 3,15E-04 | 9,69E-03 |
| <i>ARMC7</i>    | -1,19 | 5,81E-05 | 3,99E-03 |
| <i>ARMCX2</i>   | -1,25 | 1,71E-04 | 6,98E-03 |
| <i>ASB7</i>     | -1,20 | 7,66E-05 | 4,67E-03 |
| <i>ASXL3</i>    | -1,28 | 3,26E-04 | 9,88E-03 |
| <i>ATAD2B</i>   | -1,20 | 2,30E-04 | 8,02E-03 |
| <i>ATAT1</i>    | -1,15 | 3,01E-04 | 9,43E-03 |
| <i>ATF3</i>     | 1,53  | 1,24E-04 | 6,03E-03 |
| <i>ATF4</i>     | 1,22  | 1,68E-04 | 6,92E-03 |
| <i>ATF7</i>     | 1,16  | 2,11E-04 | 7,74E-03 |
| <i>ATF7IP2</i>  | -1,21 | 8,01E-05 | 4,81E-03 |
| <i>ATP1B3</i>   | 1,24  | 2,26E-04 | 7,98E-03 |
| <i>ATP2A3</i>   | 1,35  | 1,84E-04 | 7,24E-03 |
| <i>BAG3</i>     | 1,50  | 4,04E-05 | 3,31E-03 |
| <i>BBS10</i>    | -1,25 | 2,52E-04 | 8,39E-03 |
| <i>BCL7B</i>    | 1,16  | 2,28E-05 | 2,57E-03 |
| <i>BDKRB2</i>   | 1,90  | 5,23E-05 | 3,83E-03 |
| <i>BICD1</i>    | 1,24  | 2,02E-06 | 8,31E-04 |
| <i>BMP8B</i>    | 1,48  | 1,28E-04 | 6,13E-03 |
| <i>BORCS6</i>   | -1,20 | 9,90E-05 | 5,42E-03 |
| <i>BRF2</i>     | -1,35 | 2,25E-04 | 7,98E-03 |
| <i>BTN3A1</i>   | -1,20 | 1,72E-04 | 6,98E-03 |
| <i>BTN3A3</i>   | -1,18 | 2,80E-04 | 8,94E-03 |
| <i>C10orf76</i> | 1,23  | 2,56E-04 | 8,45E-03 |
| <i>C11orf21</i> | -1,37 | 2,40E-05 | 2,59E-03 |
| <i>C11orf96</i> | 2,37  | 1,29E-04 | 6,13E-03 |
| <i>C12orf73</i> | -1,27 | 2,03E-04 | 7,57E-03 |
| <i>C16orf70</i> | -1,16 | 8,66E-06 | 1,52E-03 |
| <i>C5orf56</i>  | -1,37 | 6,15E-05 | 4,08E-03 |
| <i>C8orf44</i>  | -1,24 | 1,54E-04 | 6,66E-03 |
| <i>CALHM5</i>   | 1,31  | 2,47E-04 | 8,31E-03 |
| <i>CASKIN2</i>  | 1,28  | 1,35E-04 | 6,27E-03 |
| <i>CCBE1</i>    | -2,55 | 2,25E-08 | 1,16E-04 |
| <i>CCDC8</i>    | -1,26 | 1,29E-04 | 6,13E-03 |
| <i>CCNA2</i>    | -1,12 | 2,72E-04 | 8,80E-03 |
| <i>CCND2</i>    | 1,29  | 2,57E-05 | 2,64E-03 |
| <i>CD44</i>     | 2,28  | 7,66E-07 | 5,81E-04 |
| <i>CD58</i>     | 1,24  | 7,21E-05 | 4,47E-03 |
| <i>CDAN1</i>    | -1,15 | 1,93E-04 | 7,38E-03 |
| <i>CDC73</i>    | 1,13  | 3,46E-05 | 3,04E-03 |

|                |       |          |          |
|----------------|-------|----------|----------|
| <i>CDH3</i>    | -1,61 | 2,90E-04 | 9,18E-03 |
| <i>CDKN2A</i>  | 1,44  | 1,11E-05 | 1,69E-03 |
| <i>CDKN2B</i>  | 1,34  | 1,04E-04 | 5,54E-03 |
| <i>CDON</i>    | -1,77 | 6,92E-06 | 1,32E-03 |
| <i>CDV3</i>    | 1,20  | 1,72E-04 | 6,98E-03 |
| <i>CEBPG</i>   | 1,36  | 2,09E-05 | 2,47E-03 |
| <i>CFAP45</i>  | 1,37  | 9,40E-05 | 5,29E-03 |
| <i>CHMP1B</i>  | 1,24  | 1,64E-04 | 6,84E-03 |
| <i>CHRNB1</i>  | -1,16 | 2,00E-04 | 7,51E-03 |
| <i>CHST12</i>  | -1,30 | 5,23E-07 | 4,87E-04 |
| <i>CHST6</i>   | 1,49  | 3,29E-05 | 2,98E-03 |
| <i>CLK4</i>    | -1,32 | 8,55E-05 | 5,00E-03 |
| <i>CNST</i>    | 1,35  | 1,38E-04 | 6,35E-03 |
| <i>COA7</i>    | -1,21 | 2,44E-04 | 8,23E-03 |
| <i>COLEC12</i> | -2,63 | 2,13E-08 | 1,16E-04 |
| <i>COMP</i>    | 3,53  | 8,98E-05 | 5,17E-03 |
| <i>COQ10B</i>  | 1,32  | 2,83E-06 | 9,42E-04 |
| <i>CORIN</i>   | 1,61  | 1,36E-04 | 6,29E-03 |
| <i>COX19</i>   | -1,23 | 5,73E-05 | 3,99E-03 |
| <i>CPNE5</i>   | -1,63 | 4,81E-05 | 3,67E-03 |
| <i>CPXM2</i>   | 1,46  | 1,48E-04 | 6,54E-03 |
| <i>CREB5</i>   | 1,59  | 1,23E-04 | 6,03E-03 |
| <i>CREM</i>    | 1,53  | 3,20E-04 | 9,76E-03 |
| <i>CROCCP3</i> | -1,29 | 1,27E-04 | 6,13E-03 |
| <i>CSF3</i>    | 4,05  | 1,85E-04 | 7,26E-03 |
| <i>CSNK1A1</i> | 1,26  | 1,04E-06 | 6,46E-04 |
| <i>CSRNP1</i>  | 3,85  | 2,10E-05 | 2,47E-03 |
| <i>CUZD1</i>   | -1,27 | 1,83E-04 | 7,23E-03 |
| <i>CYFIP2</i>  | 1,59  | 3,72E-05 | 3,14E-03 |
| <i>CYSLTR2</i> | 1,33  | 2,26E-04 | 7,98E-03 |
| <i>DAAM1</i>   | 1,55  | 2,91E-05 | 2,82E-03 |
| <i>DCAKD</i>   | -1,17 | 1,42E-04 | 6,45E-03 |
| <i>DCLRE1C</i> | -1,18 | 1,16E-04 | 5,86E-03 |
| <i>DCP2</i>    | -1,19 | 1,71E-04 | 6,98E-03 |
| <i>DCUN1D2</i> | -1,20 | 1,87E-05 | 2,35E-03 |
| <i>DDX25</i>   | 1,23  | 2,29E-05 | 2,57E-03 |
| <i>DDX3X</i>   | 1,28  | 5,27E-05 | 3,83E-03 |
| <i>DENND6B</i> | -1,30 | 1,13E-04 | 5,76E-03 |
| <i>DET1</i>    | -1,42 | 4,88E-06 | 1,18E-03 |
| <i>DHDDS</i>   | -1,27 | 1,24E-04 | 6,05E-03 |
| <i>DIO3OS</i>  | -1,40 | 1,93E-04 | 7,38E-03 |
| <i>DIRC2</i>   | 1,18  | 8,71E-05 | 5,06E-03 |
| <i>DLC1</i>    | 1,65  | 1,15E-05 | 1,69E-03 |
| <i>DMTF1</i>   | -1,27 | 3,96E-05 | 3,27E-03 |

|                 |       |          |          |
|-----------------|-------|----------|----------|
| <i>DNAJB4</i>   | 1,42  | 3,20E-05 | 2,96E-03 |
| <i>DNM3OS</i>   | -1,64 | 2,51E-06 | 9,01E-04 |
| <i>DPH3</i>     | 1,49  | 1,04E-06 | 6,46E-04 |
| <i>DTD1</i>     | -1,19 | 2,27E-04 | 7,99E-03 |
| <i>DUSP10</i>   | 1,80  | 3,83E-05 | 3,20E-03 |
| <i>DUSP14</i>   | 1,58  | 1,68E-04 | 6,92E-03 |
| <i>DUSP5</i>    | 2,08  | 3,16E-04 | 9,69E-03 |
| <i>DUSP8</i>    | 1,60  | 3,22E-06 | 1,01E-03 |
| <i>DYRK3</i>    | 1,58  | 2,29E-04 | 8,02E-03 |
| <i>EARS2</i>    | -1,32 | 7,73E-05 | 4,69E-03 |
| <i>EDRF1</i>    | -1,26 | 1,15E-05 | 1,69E-03 |
| <i>EED</i>      | -1,21 | 1,06E-04 | 5,62E-03 |
| <i>EFNB1</i>    | -1,37 | 2,48E-05 | 2,62E-03 |
| <i>ELK3</i>     | 1,23  | 2,93E-04 | 9,29E-03 |
| <i>ELOVL3</i>   | 1,25  | 4,44E-05 | 3,46E-03 |
| <i>EMID1</i>    | -1,30 | 6,63E-06 | 1,30E-03 |
| <i>EMX2</i>     | -1,92 | 6,15E-05 | 4,08E-03 |
| <i>EMX2OS</i>   | -2,19 | 8,15E-07 | 6,03E-04 |
| <i>ENTPD1</i>   | 1,32  | 6,52E-06 | 1,30E-03 |
| <i>EPHB3</i>    | -1,51 | 6,03E-05 | 4,05E-03 |
| <i>EPM2AIP1</i> | -1,58 | 2,14E-05 | 2,47E-03 |
| <i>EPO</i>      | -1,68 | 1,00E-05 | 1,62E-03 |
| <i>EPS8L1</i>   | -1,37 | 1,32E-04 | 6,17E-03 |
| <i>EXO5</i>     | -1,17 | 4,19E-05 | 3,36E-03 |
| <i>EXOSC9</i>   | 1,20  | 2,78E-04 | 8,92E-03 |
| <i>F2R</i>      | 1,52  | 1,10E-06 | 6,46E-04 |
| <i>FABP4</i>    | -1,86 | 5,09E-05 | 3,79E-03 |
| <i>FADD</i>     | -1,25 | 7,87E-06 | 1,40E-03 |
| <i>FAM102A</i>  | -1,26 | 1,09E-04 | 5,72E-03 |
| <i>FAM107A</i>  | 1,58  | 1,36E-04 | 6,28E-03 |
| <i>FAM107B</i>  | 1,49  | 7,34E-05 | 4,52E-03 |
| <i>FAM118A</i>  | 1,18  | 2,80E-04 | 8,94E-03 |
| <i>FAM133CP</i> | 1,25  | 3,11E-05 | 2,92E-03 |
| <i>FAM177A1</i> | 1,30  | 4,37E-05 | 3,44E-03 |
| <i>FAM19A5</i>  | -1,52 | 1,62E-04 | 6,80E-03 |
| <i>FAM200A</i>  | -1,32 | 1,13E-05 | 1,69E-03 |
| <i>FAM212A</i>  | -1,31 | 2,13E-05 | 2,47E-03 |
| <i>FAM212B</i>  | 1,22  | 5,54E-05 | 3,93E-03 |
| <i>FAM217B</i>  | -1,32 | 2,38E-04 | 8,15E-03 |
| <i>FAM78A</i>   | -1,46 | 3,90E-06 | 1,05E-03 |
| <i>FAM83D</i>   | 4,15  | 1,61E-05 | 2,11E-03 |
| <i>FAM84B</i>   | -1,60 | 1,44E-06 | 7,13E-04 |
| <i>FAM98B</i>   | -1,16 | 1,99E-04 | 7,51E-03 |
| <i>FAN1</i>     | -1,22 | 1,50E-04 | 6,58E-03 |

|                |       |          |          |
|----------------|-------|----------|----------|
| <i>FANCF</i>   | -1,44 | 4,83E-05 | 3,68E-03 |
| <i>FBLN5</i>   | -1,41 | 2,60E-04 | 8,56E-03 |
| <i>FEM1C</i>   | 1,32  | 7,67E-06 | 1,39E-03 |
| <i>FIGNL1</i>  | -1,23 | 9,27E-05 | 5,29E-03 |
| <i>FLCN</i>    | -1,32 | 1,49E-04 | 6,56E-03 |
| <i>FLRT2</i>   | -1,32 | 2,27E-05 | 2,57E-03 |
| <i>FMO1</i>    | -2,15 | 2,69E-06 | 9,19E-04 |
| <i>FMO2</i>    | -1,68 | 6,93E-05 | 4,40E-03 |
| <i>FOSL2</i>   | 1,67  | 6,69E-05 | 4,34E-03 |
| <i>FOXA2</i>   | 1,22  | 8,49E-05 | 4,98E-03 |
| <i>FOXC2</i>   | 1,15  | 2,87E-04 | 9,13E-03 |
| <i>FOXL1</i>   | 1,28  | 2,01E-04 | 7,53E-03 |
| <i>FRAT2</i>   | -1,31 | 1,10E-04 | 5,72E-03 |
| <i>FRMD5</i>   | 1,27  | 5,60E-05 | 3,95E-03 |
| <i>FSTL3</i>   | 1,37  | 1,55E-04 | 6,69E-03 |
| <i>FUT1</i>    | 1,31  | 1,73E-04 | 7,00E-03 |
| <i>FZD10</i>   | 1,72  | 1,31E-04 | 6,13E-03 |
| <i>FZD4</i>    | -1,25 | 8,41E-05 | 4,96E-03 |
| <i>GADD45B</i> | 3,58  | 1,94E-04 | 7,38E-03 |
| <i>GAS2L1</i>  | 1,18  | 3,52E-05 | 3,04E-03 |
| <i>GCNA</i>    | -1,37 | 4,99E-06 | 1,18E-03 |
| <i>GDF10</i>   | -1,67 | 2,17E-04 | 7,86E-03 |
| <i>GDF7</i>    | -2,15 | 1,36E-06 | 6,92E-04 |
| <i>GIMAP1</i>  | -1,39 | 2,33E-04 | 8,04E-03 |
| <i>GIMAP8</i>  | -1,40 | 1,73E-04 | 6,99E-03 |
| <i>GLI1</i>    | -1,81 | 3,21E-08 | 1,25E-04 |
| <i>GLP2R</i>   | -1,97 | 9,57E-06 | 1,60E-03 |
| <i>GOLPH3L</i> | -1,12 | 1,57E-04 | 6,74E-03 |
| <i>GPR155</i>  | 1,39  | 1,73E-05 | 2,22E-03 |
| <i>GPR22</i>   | -1,53 | 8,05E-05 | 4,81E-03 |
| <i>GPRC5A</i>  | 1,84  | 2,18E-04 | 7,86E-03 |
| <i>GPRC6A</i>  | 1,21  | 2,32E-05 | 2,58E-03 |
| <i>GRID1</i>   | -1,42 | 2,71E-05 | 2,71E-03 |
| <i>GSPT2</i>   | -1,20 | 2,24E-06 | 8,60E-04 |
| <i>GUCY2GP</i> | 1,12  | 1,30E-04 | 6,13E-03 |
| <i>GVINP1</i>  | -1,33 | 2,84E-06 | 9,42E-04 |
| <i>H19</i>     | -3,92 | 2,04E-07 | 4,12E-04 |
| <i>HABP4</i>   | 1,27  | 6,54E-06 | 1,30E-03 |
| <i>HAGH</i>    | 1,20  | 1,80E-04 | 7,14E-03 |
| <i>HAO1</i>    | 1,21  | 3,37E-05 | 3,02E-03 |
| <i>HAS2</i>    | 1,60  | 2,66E-04 | 8,68E-03 |
| <i>HBEGF</i>   | 1,94  | 6,91E-06 | 1,32E-03 |
| <i>HECW1</i>   | 1,16  | 3,39E-05 | 3,02E-03 |
| <i>HHIPL2</i>  | 2,01  | 5,88E-06 | 1,26E-03 |

|                 |       |          |          |
|-----------------|-------|----------|----------|
| <i>HIGD1A</i>   | 1,28  | 1,80E-04 | 7,16E-03 |
| <i>HOTTIP</i>   | -1,44 | 2,55E-06 | 9,01E-04 |
| <i>HOXA10</i>   | -1,33 | 2,19E-04 | 7,86E-03 |
| <i>HOXA9</i>    | -1,53 | 2,10E-06 | 8,40E-04 |
| <i>HOXB5</i>    | -1,56 | 2,60E-06 | 9,02E-04 |
| <i>HPS6</i>     | -1,23 | 1,93E-04 | 7,38E-03 |
| <i>HS3ST1</i>   | -1,49 | 5,27E-05 | 3,83E-03 |
| <i>HSP90AA1</i> | 1,26  | 2,47E-04 | 8,31E-03 |
| <i>HSPB8</i>    | 1,52  | 1,69E-05 | 2,18E-03 |
| <i>HUS1B</i>    | 1,23  | 6,34E-05 | 4,19E-03 |
| <i>ICAM1</i>    | 2,61  | 8,89E-05 | 5,12E-03 |
| <i>ID3</i>      | 1,35  | 8,04E-05 | 4,81E-03 |
| <i>ID4</i>      | 1,45  | 1,11E-04 | 5,73E-03 |
| <i>IDH1</i>     | -1,28 | 1,71E-04 | 6,98E-03 |
| <i>IFRD1</i>    | 1,46  | 5,20E-05 | 3,83E-03 |
| <i>IGF2</i>     | -1,86 | 1,63E-05 | 2,13E-03 |
| <i>IKZF1</i>    | -1,22 | 1,98E-04 | 7,49E-03 |
| <i>IL2RB</i>    | -1,57 | 2,55E-04 | 8,43E-03 |
| <i>IL6</i>      | 6,55  | 1,27E-04 | 6,11E-03 |
| <i>ISCA2</i>    | -1,26 | 3,85E-06 | 1,05E-03 |
| <i>ISLR</i>     | -1,30 | 6,16E-05 | 4,08E-03 |
| <i>ITFG2</i>    | -1,19 | 1,16E-04 | 5,86E-03 |
| <i>ITGA1</i>    | 1,46  | 1,62E-04 | 6,80E-03 |
| <i>ITGA7</i>    | 1,50  | 1,42E-04 | 6,45E-03 |
| <i>ITGB3</i>    | 1,51  | 1,59E-04 | 6,74E-03 |
| <i>JDP2</i>     | 1,44  | 2,05E-05 | 2,47E-03 |
| <i>JMJD1C</i>   | 1,27  | 1,36E-04 | 6,29E-03 |
| <i>JUND</i>     | 1,64  | 1,21E-06 | 6,65E-04 |
| <i>KBTBD6</i>   | -1,35 | 2,70E-05 | 2,71E-03 |
| <i>KBTBD7</i>   | -1,40 | 1,36E-05 | 1,93E-03 |
| <i>KCNAB1</i>   | 1,50  | 2,66E-04 | 8,69E-03 |
| <i>KCNG1</i>    | -2,69 | 2,52E-04 | 8,39E-03 |
| <i>KCNK2</i>    | 1,20  | 5,81E-05 | 3,99E-03 |
| <i>KCNQ1OT1</i> | -1,65 | 6,75E-07 | 5,42E-04 |
| <i>KCTD6</i>    | -1,20 | 2,33E-04 | 8,04E-03 |
| <i>KHDC4</i>    | -1,34 | 4,54E-05 | 3,51E-03 |
| <i>KIAA0040</i> | 1,38  | 5,72E-05 | 3,99E-03 |
| <i>KIF1C</i>    | 1,16  | 2,97E-04 | 9,35E-03 |
| <i>KIF5B</i>    | 1,25  | 1,12E-05 | 1,69E-03 |
| <i>KLF10</i>    | 1,59  | 1,67E-04 | 6,92E-03 |
| <i>KLF11</i>    | 1,24  | 2,18E-04 | 7,86E-03 |
| <i>KLF14</i>    | 1,26  | 2,95E-04 | 9,32E-03 |
| <i>KLF7</i>     | 1,34  | 1,97E-04 | 7,46E-03 |
| <i>KLF9</i>     | 1,63  | 2,89E-04 | 9,17E-03 |

|                     |       |          |          |
|---------------------|-------|----------|----------|
| <i>KLHL13</i>       | -1,60 | 2,06E-05 | 2,47E-03 |
| <i>KLHL4</i>        | -1,28 | 4,84E-05 | 3,68E-03 |
| <i>KLHL9</i>        | -1,21 | 1,88E-04 | 7,31E-03 |
| <i>KLK15</i>        | 1,25  | 1,61E-04 | 6,79E-03 |
| <i>KLRG1</i>        | -1,34 | 7,86E-05 | 4,74E-03 |
| <i>KRTAP6-3</i>     | 1,58  | 1,29E-04 | 6,13E-03 |
| <i>L1CAM</i>        | 1,26  | 5,28E-05 | 3,83E-03 |
| <i>L3MBTL1</i>      | -1,23 | 1,04E-04 | 5,56E-03 |
| <i>LARP1B</i>       | 1,14  | 4,51E-05 | 3,49E-03 |
| <i>LDLR</i>         | 1,41  | 4,48E-06 | 1,14E-03 |
| <i>LEFTY2</i>       | -1,68 | 9,91E-06 | 1,62E-03 |
| <i>LINC00461</i>    | -1,58 | 7,68E-06 | 1,39E-03 |
| <i>LINC00894</i>    | -1,33 | 6,94E-05 | 4,40E-03 |
| <i>LMNA</i>         | 1,53  | 1,68E-05 | 2,17E-03 |
| <i>LMO3</i>         | -1,58 | 1,57E-04 | 6,74E-03 |
| <i>LOC100129455</i> | 1,21  | 1,32E-04 | 6,17E-03 |
| <i>LOC105372255</i> | -1,54 | 4,60E-07 | 4,87E-04 |
| <i>LOC400684</i>    | -1,25 | 1,45E-04 | 6,49E-03 |
| <i>LOC728743</i>    | -1,27 | 2,12E-05 | 2,47E-03 |
| <i>LPAR6</i>        | -1,46 | 3,08E-05 | 2,90E-03 |
| <i>LRP1B</i>        | 1,55  | 1,16E-04 | 5,86E-03 |
| <i>LRRRC8C</i>      | 1,25  | 2,67E-04 | 8,71E-03 |
| <i>LRRFIP1</i>      | 1,89  | 4,64E-07 | 4,87E-04 |
| <i>LURAP1L</i>      | 1,27  | 9,32E-05 | 5,29E-03 |
| <i>MAF</i>          | -1,35 | 5,37E-05 | 3,86E-03 |
| <i>MAFF</i>         | 2,60  | 2,33E-04 | 8,04E-03 |
| <i>MAFK</i>         | 1,47  | 2,46E-05 | 2,62E-03 |
| <i>MAGEA3</i>       | 1,37  | 1,48E-04 | 6,55E-03 |
| <i>MAGEA6</i>       | 1,37  | 1,48E-04 | 6,55E-03 |
| <i>MAML2</i>        | 1,32  | 4,92E-05 | 3,70E-03 |
| <i>MAP10</i>        | -1,20 | 8,39E-05 | 4,95E-03 |
| <i>MAPT</i>         | 1,32  | 2,72E-04 | 8,80E-03 |
| <i>MBTD1</i>        | -1,45 | 2,57E-05 | 2,64E-03 |
| <i>MCM9</i>         | -1,35 | 3,48E-05 | 3,04E-03 |
| <i>MCTP1</i>        | 1,57  | 1,60E-06 | 7,43E-04 |
| <i>MDK</i>          | -1,79 | 3,19E-05 | 2,96E-03 |
| <i>MED21</i>        | 1,19  | 1,63E-06 | 7,44E-04 |
| <i>MEN1</i>         | -1,17 | 4,64E-07 | 4,87E-04 |
| <i>MFSD4B</i>       | -1,26 | 1,48E-04 | 6,54E-03 |
| <i>MGLL</i>         | 1,34  | 6,06E-07 | 5,09E-04 |
| <i>MIDN</i>         | 1,39  | 3,04E-04 | 9,49E-03 |
| <i>MLC1</i>         | 1,76  | 5,92E-05 | 4,02E-03 |
| <i>MLF1</i>         | 1,77  | 2,11E-06 | 8,40E-04 |
| <i>MME</i>          | 2,36  | 1,83E-05 | 2,32E-03 |

|                 |       |          |          |
|-----------------|-------|----------|----------|
| <i>MS4A2</i>    | -1,60 | 2,98E-04 | 9,35E-03 |
| <i>MSANTD3</i>  | 1,24  | 4,11E-05 | 3,33E-03 |
| <i>MSI1</i>     | 1,18  | 5,34E-05 | 3,85E-03 |
| <i>MSX2</i>     | 1,50  | 9,56E-06 | 1,60E-03 |
| <i>MSX2P1</i>   | 1,60  | 5,48E-05 | 3,92E-03 |
| <i>MT2A</i>     | 1,82  | 2,32E-04 | 8,04E-03 |
| <i>MYEF2</i>    | 1,26  | 5,82E-05 | 3,99E-03 |
| <i>MYO5A</i>    | 1,30  | 6,63E-06 | 1,30E-03 |
| <i>MYRFL</i>    | 1,27  | 3,17E-04 | 9,72E-03 |
| <i>NAALAD2</i>  | -1,21 | 4,16E-05 | 3,35E-03 |
| <i>NAMPT</i>    | 2,28  | 3,11E-04 | 9,63E-03 |
| <i>NANOG</i>    | -1,44 | 8,34E-05 | 4,94E-03 |
| <i>NANOS3</i>   | 1,27  | 1,00E-04 | 5,45E-03 |
| <i>NAPEPLD</i>  | -1,37 | 6,67E-05 | 4,34E-03 |
| <i>NAPG</i>     | 1,18  | 1,46E-04 | 6,52E-03 |
| <i>NAT2</i>     | -1,22 | 4,36E-05 | 3,44E-03 |
| <i>NECTIN2</i>  | 1,32  | 2,08E-04 | 7,69E-03 |
| <i>NEDD9</i>    | 2,01  | 3,64E-06 | 1,05E-03 |
| <i>NEURL1</i>   | -1,90 | 3,29E-05 | 2,98E-03 |
| <i>NFATC2</i>   | 2,35  | 6,95E-07 | 5,42E-04 |
| <i>NFIL3</i>    | 2,15  | 2,98E-04 | 9,35E-03 |
| <i>NHEJ1</i>    | -1,16 | 7,16E-05 | 4,46E-03 |
| <i>NKG7</i>     | -1,47 | 3,12E-04 | 9,65E-03 |
| <i>NLRC4</i>    | -1,28 | 2,82E-04 | 9,00E-03 |
| <i>NR4A2</i>    | 2,73  | 2,21E-04 | 7,90E-03 |
| <i>NR4A3</i>    | 4,47  | 9,10E-06 | 1,57E-03 |
| <i>NSUN5</i>    | -1,19 | 1,10E-04 | 5,72E-03 |
| <i>NSUN5P2</i>  | -1,25 | 1,75E-04 | 7,03E-03 |
| <i>NTF3</i>     | 1,29  | 5,89E-05 | 4,01E-03 |
| <i>ODF3L1</i>   | 1,67  | 9,48E-06 | 1,60E-03 |
| <i>OGG1</i>     | -1,20 | 9,00E-06 | 1,56E-03 |
| <i>OR2B2</i>    | 1,24  | 7,72E-06 | 1,39E-03 |
| <i>OR7A2P</i>   | 1,18  | 7,41E-05 | 4,56E-03 |
| <i>OR7E156P</i> | 1,24  | 4,13E-07 | 4,87E-04 |
| <i>OR7E24</i>   | 1,21  | 2,13E-05 | 2,47E-03 |
| <i>OR7E47P</i>  | 1,34  | 5,93E-05 | 4,02E-03 |
| <i>OSMR</i>     | 1,26  | 2,43E-04 | 8,21E-03 |
| <i>OTOS</i>     | 1,30  | 2,50E-04 | 8,34E-03 |
| <i>OXSM</i>     | -1,28 | 2,58E-05 | 2,64E-03 |
| <i>PAFAH1B3</i> | -1,27 | 9,50E-05 | 5,31E-03 |
| <i>PARP16</i>   | -1,22 | 4,10E-05 | 3,33E-03 |
| <i>PARS2</i>    | -1,47 | 3,56E-06 | 1,05E-03 |
| <i>PCDH18</i>   | -1,46 | 3,44E-05 | 3,04E-03 |
| <i>PCDHGC4</i>  | 1,29  | 6,74E-06 | 1,31E-03 |



|                 |       |          |          |
|-----------------|-------|----------|----------|
| <i>PDE11A</i>   | -1,97 | 9,57E-05 | 5,34E-03 |
| <i>PDE5A</i>    | 1,49  | 2,47E-04 | 8,31E-03 |
| <i>PDGFRB</i>   | 1,24  | 9,89E-05 | 5,42E-03 |
| <i>PDLIM1</i>   | 1,49  | 1,08E-06 | 6,46E-04 |
| <i>PDLIM3</i>   | 2,31  | 2,14E-05 | 2,47E-03 |
| <i>PEA15</i>    | 1,18  | 1,49E-04 | 6,56E-03 |
| <i>PEX11B</i>   | -1,24 | 1,44E-04 | 6,49E-03 |
| <i>PEX12</i>    | -1,41 | 1,61E-05 | 2,11E-03 |
| <i>PIGA</i>     | 1,33  | 6,86E-05 | 4,37E-03 |
| <i>PJA1</i>     | -1,20 | 9,41E-05 | 5,29E-03 |
| <i>PJVK</i>     | -1,26 | 2,23E-04 | 7,92E-03 |
| <i>PLEKHF1</i>  | -1,22 | 9,75E-05 | 5,40E-03 |
| <i>PLEKHJ1</i>  | -1,24 | 7,56E-06 | 1,39E-03 |
| <i>PLK1</i>     | -1,20 | 1,14E-04 | 5,80E-03 |
| <i>PLK3</i>     | 2,24  | 2,36E-05 | 2,59E-03 |
| <i>PLXNA2</i>   | 1,31  | 1,19E-04 | 5,89E-03 |
| <i>PMEL</i>     | -2,91 | 1,77E-04 | 7,08E-03 |
| <i>PMS2P10</i>  | -1,40 | 4,14E-05 | 3,34E-03 |
| <i>PNP</i>      | 1,30  | 1,59E-04 | 6,74E-03 |
| <i>PPARGC1A</i> | 1,44  | 2,18E-04 | 7,86E-03 |
| <i>PPAT</i>     | -1,16 | 7,73E-05 | 4,69E-03 |
| <i>PPIL2</i>    | 1,23  | 2,06E-04 | 7,67E-03 |
| <i>PPP1R15B</i> | 1,48  | 6,16E-05 | 4,08E-03 |
| <i>PPP1R3E</i>  | -1,30 | 4,82E-06 | 1,18E-03 |
| <i>PPP1R9A</i>  | 1,34  | 2,19E-04 | 7,86E-03 |
| <i>PRICKLE2</i> | -1,26 | 1,49E-04 | 6,56E-03 |
| <i>PRKAG2</i>   | 1,29  | 1,67E-04 | 6,92E-03 |
| <i>PRMT6</i>    | -1,28 | 2,61E-06 | 9,02E-04 |
| <i>PRPF39</i>   | -1,23 | 1,77E-04 | 7,08E-03 |
| <i>PRPS2</i>    | -1,34 | 5,54E-05 | 3,93E-03 |
| <i>PSMD12</i>   | 1,17  | 2,77E-04 | 8,90E-03 |
| <i>PTCD2</i>    | -1,27 | 2,53E-04 | 8,40E-03 |
| <i>PTGDR2</i>   | -1,20 | 6,28E-06 | 1,30E-03 |
| <i>PTH1R</i>    | -1,25 | 1,68E-04 | 6,92E-03 |
| <i>PTMA</i>     | 1,23  | 1,29E-06 | 6,79E-04 |
| <i>PTN</i>      | -1,69 | 6,88E-06 | 1,32E-03 |
| <i>PTPN11</i>   | 1,20  | 1,54E-06 | 7,34E-04 |
| <i>PVR</i>      | 1,24  | 1,92E-04 | 7,38E-03 |
| <i>PWWP2B</i>   | -1,23 | 4,19E-05 | 3,36E-03 |
| <i>PXDC1</i>    | 1,33  | 2,12E-05 | 2,47E-03 |
| <i>PYY2</i>     | 1,43  | 1,75E-04 | 7,02E-03 |
| <i>QPRT</i>     | -1,25 | 1,10E-04 | 5,72E-03 |
| <i>RAB21</i>    | 1,23  | 2,58E-05 | 2,64E-03 |
| <i>RAB27A</i>   | 1,23  | 3,23E-04 | 9,81E-03 |

|                 |       |          |          |
|-----------------|-------|----------|----------|
| <i>RAB32</i>    | 1,36  | 2,55E-06 | 9,01E-04 |
| <i>RAD54B</i>   | -1,26 | 5,64E-06 | 1,25E-03 |
| <i>RALGDS</i>   | 1,63  | 1,22E-04 | 5,97E-03 |
| <i>RAP1B</i>    | 1,27  | 5,06E-05 | 3,77E-03 |
| <i>RBM12B</i>   | -1,23 | 2,03E-04 | 7,57E-03 |
| <i>RBM4B</i>    | -1,23 | 9,91E-06 | 1,62E-03 |
| <i>RBM5</i>     | -1,19 | 5,78E-05 | 3,99E-03 |
| <i>RBP5</i>     | -1,36 | 1,27E-04 | 6,11E-03 |
| <i>RCAN1</i>    | 2,49  | 3,42E-06 | 1,04E-03 |
| <i>RCAN3</i>    | 1,32  | 2,22E-04 | 7,90E-03 |
| <i>RCBTB2</i>   | -1,19 | 1,42E-04 | 6,45E-03 |
| <i>RDH10</i>    | 1,45  | 4,24E-05 | 3,38E-03 |
| <i>RHEX</i>     | -1,73 | 1,63E-04 | 6,82E-03 |
| <i>RHOB</i>     | 1,56  | 1,42E-05 | 1,98E-03 |
| <i>RHOQ</i>     | 1,34  | 2,95E-04 | 9,32E-03 |
| <i>RIMKLB</i>   | 1,38  | 4,81E-05 | 3,67E-03 |
| <i>RIPK1</i>    | 1,44  | 2,68E-04 | 8,71E-03 |
| <i>RIPK2</i>    | 1,22  | 6,60E-05 | 4,34E-03 |
| <i>RLIM</i>     | 1,33  | 2,06E-05 | 2,47E-03 |
| <i>RMI1</i>     | -1,41 | 1,35E-05 | 1,92E-03 |
| <i>RND2</i>     | 1,42  | 1,91E-05 | 2,39E-03 |
| <i>RND3</i>     | 2,29  | 2,85E-06 | 9,42E-04 |
| <i>RNF122</i>   | 2,71  | 4,88E-05 | 3,69E-03 |
| <i>ROR1</i>     | -1,42 | 7,60E-06 | 1,39E-03 |
| <i>RORC</i>     | 1,23  | 3,09E-04 | 9,59E-03 |
| <i>RPAIN</i>    | -1,37 | 4,49E-05 | 3,49E-03 |
| <i>RPP25L</i>   | -1,18 | 2,77E-04 | 8,90E-03 |
| <i>RPUSD2</i>   | -1,37 | 1,22E-06 | 6,65E-04 |
| <i>RSRP1</i>    | -1,24 | 9,45E-05 | 5,30E-03 |
| <i>RTP4</i>     | -1,30 | 1,52E-04 | 6,63E-03 |
| <i>RXRA</i>     | -1,32 | 2,88E-05 | 2,81E-03 |
| <i>SALL3</i>    | 2,23  | 2,95E-06 | 9,66E-04 |
| <i>SBDS</i>     | 1,27  | 9,39E-07 | 6,46E-04 |
| <i>SCCPDH</i>   | 1,21  | 4,12E-06 | 1,07E-03 |
| <i>SCD5</i>     | 1,18  | 3,87E-05 | 3,22E-03 |
| <i>SCYL3</i>    | -1,17 | 2,77E-04 | 8,90E-03 |
| <i>SDC2</i>     | 1,46  | 1,04E-05 | 1,65E-03 |
| <i>SDE2</i>     | 1,27  | 1,05E-04 | 5,58E-03 |
| <i>SEMA5B</i>   | 1,40  | 1,82E-04 | 7,22E-03 |
| <i>SENP8</i>    | -1,19 | 3,27E-04 | 9,88E-03 |
| <i>SERPIN8</i>  | 1,44  | 1,51E-04 | 6,62E-03 |
| <i>SERPINE1</i> | 2,09  | 1,81E-06 | 8,12E-04 |
| <i>SERTAD1</i>  | 2,37  | 5,24E-05 | 3,83E-03 |
| <i>SF3B3</i>    | -1,14 | 9,86E-05 | 5,42E-03 |

|                   |       |          |          |
|-------------------|-------|----------|----------|
| <i>SH3BP4</i>     | 1,31  | 6,80E-05 | 4,36E-03 |
| <i>SIRT4</i>      | -1,34 | 1,55E-05 | 2,09E-03 |
| <i>SIX1</i>       | 2,76  | 2,10E-05 | 2,47E-03 |
| <i>SIX3</i>       | 1,33  | 2,07E-04 | 7,68E-03 |
| <i>SKI</i>        | 1,22  | 3,10E-04 | 9,61E-03 |
| <i>SKIL</i>       | 1,32  | 5,30E-05 | 3,83E-03 |
| <i>SLC13A3</i>    | -1,33 | 3,02E-06 | 9,77E-04 |
| <i>SLC13A4</i>    | -1,12 | 2,32E-04 | 8,04E-03 |
| <i>SLC16A9</i>    | -1,34 | 3,24E-05 | 2,98E-03 |
| <i>SLC19A2</i>    | 1,67  | 3,64E-05 | 3,10E-03 |
| <i>SLC2A1</i>     | -1,71 | 8,45E-05 | 4,97E-03 |
| <i>SLC2A14</i>    | 2,69  | 5,83E-05 | 3,99E-03 |
| <i>SLC40A1</i>    | -1,95 | 4,88E-07 | 4,87E-04 |
| <i>SLITRK6</i>    | 2,04  | 3,79E-06 | 1,05E-03 |
| <i>SLK</i>        | 1,15  | 1,61E-04 | 6,79E-03 |
| <i>SLN</i>        | 2,61  | 6,99E-05 | 4,41E-03 |
| <i>SLX4IP</i>     | 1,32  | 9,99E-05 | 5,44E-03 |
| <i>SMAD1</i>      | -1,93 | 1,84E-08 | 1,16E-04 |
| <i>SMAD7</i>      | 1,37  | 2,63E-04 | 8,60E-03 |
| <i>SMARCA1</i>    | -1,18 | 2,35E-04 | 8,10E-03 |
| <i>SMPD3</i>      | -1,28 | 7,82E-05 | 4,73E-03 |
| <i>SNAI1</i>      | 2,39  | 1,44E-05 | 2,01E-03 |
| <i>SNED1</i>      | -1,28 | 3,88E-05 | 3,23E-03 |
| <i>SNHG10</i>     | -1,25 | 1,91E-04 | 7,37E-03 |
| <i>SNHG21</i>     | -1,34 | 3,35E-06 | 1,03E-03 |
| <i>SOD2</i>       | 1,60  | 2,16E-04 | 7,83E-03 |
| <i>SORCS2</i>     | -1,57 | 2,95E-04 | 9,32E-03 |
| <i>SOX4</i>       | -1,53 | 2,85E-05 | 2,79E-03 |
| <i>SPAG9</i>      | 1,13  | 8,84E-05 | 5,12E-03 |
| <i>SPATA13</i>    | 1,33  | 1,82E-04 | 7,21E-03 |
| <i>SPATA5L1</i>   | -1,19 | 1,07E-04 | 5,64E-03 |
| <i>SPHK1</i>      | 1,44  | 2,08E-04 | 7,69E-03 |
| <i>SPIN3</i>      | -1,25 | 3,58E-05 | 3,06E-03 |
| <i>SPTSSA</i>     | 1,27  | 1,56E-06 | 7,34E-04 |
| <i>SREBF1</i>     | -1,31 | 3,99E-06 | 1,05E-03 |
| <i>SRGAP1</i>     | -1,22 | 1,44E-04 | 6,47E-03 |
| <i>SRSF10</i>     | -1,18 | 2,21E-04 | 7,89E-03 |
| <i>SSH1</i>       | 1,32  | 2,01E-04 | 7,53E-03 |
| <i>SSR1</i>       | -1,20 | 2,44E-04 | 8,23E-03 |
| <i>SSTR2</i>      | 1,94  | 2,02E-04 | 7,54E-03 |
| <i>ST6GALNAC5</i> | 1,56  | 9,27E-06 | 1,58E-03 |
| <i>STK17A</i>     | 1,37  | 1,09E-05 | 1,66E-03 |
| <i>STK17B</i>     | 1,46  | 2,98E-04 | 9,35E-03 |
| <i>STK32B</i>     | -1,22 | 3,18E-04 | 9,74E-03 |

|                  |       |          |          |
|------------------|-------|----------|----------|
| <i>STK38L</i>    | 1,49  | 2,03E-06 | 8,31E-04 |
| <i>STX1A</i>     | -1,30 | 2,40E-05 | 2,59E-03 |
| <i>SVEP1</i>     | -1,57 | 6,68E-05 | 4,34E-03 |
| <i>SWAP70</i>    | 1,25  | 2,64E-05 | 2,68E-03 |
| <i>SYNPO2</i>    | 1,65  | 9,97E-05 | 5,43E-03 |
| <i>SYT1</i>      | 1,47  | 3,21E-04 | 9,77E-03 |
| <i>SYT3</i>      | 1,24  | 1,98E-04 | 7,49E-03 |
| <i>SYVN1</i>     | -1,15 | 2,20E-04 | 7,88E-03 |
| <i>TAF13</i>     | 1,46  | 6,46E-06 | 1,30E-03 |
| <i>TAGLN2</i>    | 1,41  | 5,33E-06 | 1,24E-03 |
| <i>TARID</i>     | -1,31 | 1,98E-04 | 7,48E-03 |
| <i>TBC1D9B</i>   | -1,11 | 1,62E-04 | 6,80E-03 |
| <i>TCP11L2</i>   | 1,42  | 8,66E-05 | 5,05E-03 |
| <i>TEDC1</i>     | 1,83  | 4,52E-06 | 1,14E-03 |
| <i>TEFM</i>      | -1,18 | 1,14E-04 | 5,81E-03 |
| <i>TGDS</i>      | -1,26 | 1,79E-04 | 7,13E-03 |
| <i>TGFB2</i>     | 1,68  | 3,28E-06 | 1,02E-03 |
| <i>TGFBR1</i>    | 1,41  | 1,79E-04 | 7,13E-03 |
| <i>THBD</i>      | 2,11  | 5,30E-05 | 3,83E-03 |
| <i>TIGD2</i>     | -1,27 | 2,42E-04 | 8,21E-03 |
| <i>TIGD5</i>     | -1,37 | 2,58E-07 | 4,22E-04 |
| <i>TIGD6</i>     | -1,18 | 1,09E-04 | 5,72E-03 |
| <i>TM4SF1</i>    | 1,20  | 3,13E-04 | 9,68E-03 |
| <i>TMEM121B</i>  | -1,30 | 1,55E-04 | 6,69E-03 |
| <i>TMEM186</i>   | -1,18 | 2,87E-04 | 9,11E-03 |
| <i>TMEM243</i>   | -1,26 | 2,28E-05 | 2,57E-03 |
| <i>TMEM42</i>    | -1,25 | 8,29E-05 | 4,92E-03 |
| <i>TNC</i>       | 2,20  | 3,63E-06 | 1,05E-03 |
| <i>TNFRSF10D</i> | 1,40  | 3,58E-05 | 3,06E-03 |
| <i>TNFRSF12A</i> | 3,11  | 4,08E-07 | 4,87E-04 |
| <i>TNFRSF8</i>   | -1,20 | 3,03E-04 | 9,48E-03 |
| <i>TNNT3</i>     | -1,43 | 1,18E-04 | 5,87E-03 |
| <i>TP53INP2</i>  | 1,40  | 2,71E-04 | 8,79E-03 |
| <i>TPI1</i>      | 1,41  | 9,40E-05 | 5,29E-03 |
| <i>TPM4</i>      | 1,34  | 8,60E-05 | 5,03E-03 |
| <i>TRAF3IP3</i>  | -1,43 | 1,20E-04 | 5,93E-03 |
| <i>TRAPPC10</i>  | -1,15 | 2,36E-04 | 8,10E-03 |
| <i>TRAPPC2B</i>  | 1,21  | 5,13E-05 | 3,80E-03 |
| <i>TRIB1</i>     | 3,07  | 1,09E-06 | 6,46E-04 |
| <i>TRIM13</i>    | -1,15 | 1,58E-04 | 6,74E-03 |
| <i>TRIM27</i>    | -1,16 | 1,87E-04 | 7,29E-03 |
| <i>TRIM32</i>    | -1,23 | 3,91E-05 | 3,24E-03 |
| <i>TRIM52</i>    | -1,21 | 6,70E-05 | 4,34E-03 |
| <i>TRMT13</i>    | -1,24 | 2,21E-04 | 7,90E-03 |

|                 |       |          |          |
|-----------------|-------|----------|----------|
| <i>TRO</i>      | -1,32 | 1,59E-04 | 6,74E-03 |
| <i>TSC22D4</i>  | -1,16 | 4,25E-05 | 3,38E-03 |
| <i>TSHZ2</i>    | -1,26 | 3,50E-05 | 3,04E-03 |
| <i>TTC9C</i>    | -1,22 | 1,35E-04 | 6,25E-03 |
| <i>TTLL7</i>    | 1,44  | 2,67E-04 | 8,70E-03 |
| <i>TUB</i>      | -1,24 | 7,07E-05 | 4,41E-03 |
| <i>TUBAL3</i>   | 2,27  | 5,83E-05 | 3,99E-03 |
| <i>TUBB4A</i>   | 1,32  | 2,40E-04 | 8,18E-03 |
| <i>TWISTNB</i>  | 1,21  | 3,58E-05 | 3,06E-03 |
| <i>TXNIP</i>    | -1,38 | 8,37E-05 | 4,95E-03 |
| <i>UFM1</i>     | 1,22  | 5,38E-05 | 3,86E-03 |
| <i>USP12</i>    | 1,25  | 7,29E-05 | 4,50E-03 |
| <i>USP13</i>    | 1,24  | 1,18E-04 | 5,87E-03 |
| <i>USP49</i>    | -1,15 | 1,57E-04 | 6,74E-03 |
| <i>VCAN</i>     | 1,72  | 1,69E-04 | 6,92E-03 |
| <i>VPS37B</i>   | 1,30  | 1,33E-05 | 1,90E-03 |
| <i>WDR5B</i>    | -1,28 | 1,61E-04 | 6,80E-03 |
| <i>WDR75</i>    | -1,14 | 1,86E-04 | 7,28E-03 |
| <i>WDR81</i>    | -1,17 | 2,11E-04 | 7,74E-03 |
| <i>WEE1</i>     | 2,04  | 1,59E-08 | 1,16E-04 |
| <i>WISP1</i>    | -1,50 | 1,52E-04 | 6,63E-03 |
| <i>WT1-AS</i>   | -1,58 | 3,28E-05 | 2,98E-03 |
| <i>WWTR1</i>    | 1,36  | 9,34E-05 | 5,29E-03 |
| <i>XKR8</i>     | -1,22 | 1,58E-04 | 6,74E-03 |
| <i>XRCC4</i>    | 1,14  | 1,45E-04 | 6,50E-03 |
| <i>YBX3</i>     | 1,45  | 1,54E-05 | 2,08E-03 |
| <i>YOD1</i>     | -1,15 | 5,84E-05 | 3,99E-03 |
| <i>YPEL2</i>    | 1,30  | 1,15E-05 | 1,69E-03 |
| <i>ZADH2</i>    | -1,64 | 3,70E-06 | 1,05E-03 |
| <i>ZBTB3</i>    | -1,29 | 7,47E-05 | 4,57E-03 |
| <i>ZBTB33</i>   | -1,18 | 2,31E-05 | 2,57E-03 |
| <i>ZBTB34</i>   | -1,16 | 2,54E-04 | 8,42E-03 |
| <i>ZBTB8A</i>   | -1,16 | 1,21E-04 | 5,95E-03 |
| <i>ZBTB9</i>    | -1,18 | 6,64E-05 | 4,34E-03 |
| <i>ZC3H12A</i>  | 2,09  | 4,46E-05 | 3,47E-03 |
| <i>ZC3HAV1L</i> | -1,17 | 2,23E-04 | 7,92E-03 |
| <i>ZFP62</i>    | -1,29 | 1,32E-04 | 6,18E-03 |
| <i>ZFP82</i>    | -1,35 | 3,07E-07 | 4,77E-04 |
| <i>ZKSCAN1</i>  | -1,17 | 1,91E-04 | 7,36E-03 |
| <i>ZKSCAN3</i>  | -1,26 | 2,73E-04 | 8,83E-03 |
| <i>ZKSCAN4</i>  | -1,20 | 1,73E-04 | 6,99E-03 |
| <i>ZKSCAN7</i>  | -1,46 | 9,29E-06 | 1,58E-03 |
| <i>ZNF132</i>   | -1,25 | 1,97E-05 | 2,45E-03 |
| <i>ZNF133</i>   | -1,26 | 1,54E-05 | 2,08E-03 |

|        |       |          |          |
|--------|-------|----------|----------|
| ZNF14  | -1,30 | 4,89E-05 | 3,69E-03 |
| ZNF177 | -1,42 | 9,94E-06 | 1,62E-03 |
| ZNF18  | -1,18 | 1,33E-04 | 6,21E-03 |
| ZNF184 | -1,27 | 3,16E-05 | 2,95E-03 |
| ZNF189 | -1,12 | 6,73E-05 | 4,34E-03 |
| ZNF202 | -1,28 | 1,57E-05 | 2,10E-03 |
| ZNF212 | -1,21 | 6,48E-05 | 4,27E-03 |
| ZNF214 | -1,30 | 3,79E-05 | 3,18E-03 |
| ZNF215 | -1,28 | 1,93E-04 | 7,38E-03 |
| ZNF223 | -1,17 | 2,27E-04 | 7,99E-03 |
| ZNF234 | -1,28 | 4,41E-05 | 3,45E-03 |
| ZNF276 | -1,20 | 1,58E-05 | 2,10E-03 |
| ZNF284 | -1,25 | 1,43E-04 | 6,45E-03 |
| ZNF30  | -1,45 | 2,26E-06 | 8,60E-04 |
| ZNF398 | -1,19 | 7,04E-05 | 4,41E-03 |
| ZNF416 | -1,30 | 2,62E-05 | 2,67E-03 |
| ZNF417 | -1,21 | 2,01E-04 | 7,53E-03 |
| ZNF587 | -1,21 | 2,01E-04 | 7,53E-03 |
| ZNF419 | -1,22 | 1,05E-05 | 1,65E-03 |
| ZNF439 | -1,27 | 9,70E-05 | 5,39E-03 |
| ZNF449 | -1,22 | 1,18E-04 | 5,89E-03 |
| ZNF454 | -1,22 | 9,07E-05 | 5,19E-03 |
| ZNF485 | -1,29 | 4,78E-06 | 1,18E-03 |
| ZNF490 | -1,24 | 1,27E-04 | 6,11E-03 |
| ZNF500 | -1,34 | 5,75E-05 | 3,99E-03 |
| ZNF514 | -1,26 | 1,88E-04 | 7,32E-03 |
| ZNF526 | -1,34 | 1,02E-05 | 1,64E-03 |
| ZNF550 | -1,62 | 3,12E-08 | 1,25E-04 |
| ZNF551 | -1,18 | 2,79E-04 | 8,94E-03 |
| ZNF555 | -1,38 | 2,58E-05 | 2,64E-03 |
| ZNF558 | -1,18 | 2,70E-05 | 2,71E-03 |
| ZNF563 | -1,20 | 5,94E-05 | 4,02E-03 |
| ZNF564 | -1,31 | 4,07E-05 | 3,33E-03 |
| ZNF57  | -1,30 | 3,07E-04 | 9,55E-03 |
| ZNF571 | -1,23 | 1,96E-04 | 7,43E-03 |
| ZNF572 | -1,36 | 1,23E-04 | 6,03E-03 |
| ZNF573 | -1,24 | 1,13E-04 | 5,78E-03 |
| ZNF594 | -1,32 | 1,18E-04 | 5,89E-03 |
| ZNF599 | -1,20 | 5,43E-05 | 3,89E-03 |
| ZNF606 | -1,34 | 3,99E-06 | 1,05E-03 |
| ZNF616 | -1,22 | 3,72E-05 | 3,14E-03 |
| ZNF641 | -1,15 | 2,18E-04 | 7,86E-03 |
| ZNF667 | -1,25 | 1,45E-04 | 6,50E-03 |
| ZNF691 | -1,28 | 9,07E-05 | 5,19E-03 |

|                |       |          |          |
|----------------|-------|----------|----------|
| <i>ZNF79</i>   | -1,22 | 1,79E-04 | 7,14E-03 |
| <i>ZNF823</i>  | -1,23 | 1,48E-04 | 6,55E-03 |
| <i>ZNF91</i>   | -1,24 | 6,63E-05 | 4,34E-03 |
| <i>ZRANB2</i>  | -1,23 | 1,68E-04 | 6,92E-03 |
| <i>ZSCAN12</i> | -1,16 | 1,91E-04 | 7,36E-03 |
| <i>ZSCAN9</i>  | -1,22 | 1,03E-04 | 5,54E-03 |
| <i>ZSWIM3</i>  | -1,28 | 1,84E-04 | 7,25E-03 |
